# Supplementary material
Source: PubMed Central journal article supplement (PMC9425284)
Supplement: jamainternmed-e223697-s001.pdf [file jamainternmed-e223697-s001.pdf]

## Supplemental Online Content

Brown RT, Evans JL, Valle K, Guzman D, Chen YH, Kushel MB. Factors associated with mortality among homeless older adults in California: the HOPE HOME study. *JAMA Intern Med*. Published online August 29, 2022. doi:10.1001/jamainternmed.2022.3697

**eTable.** Standardized Mortality Ratios for All-Cause Deaths by Sex and Age Group

This supplemental material has been provided by the authors to give readers additional information about their work.

**eTable 1.** Standardized Mortality Ratios for All-Cause Deaths by Sex and Age Group

| Deaths by sex and age group | Observed deaths (no.) | Expected deaths (no.) | Standardized mortality ratio (95% CI) <sup>a</sup> |
|-----------------------------|-----------------------|-----------------------|----------------------------------------------------|
| <b>2-year follow-up</b>     |                       |                       |                                                    |
| Males                       |                       |                       |                                                    |
| 45-54 years                 | 1                     | 0.44                  | -                                                  |
| 55-64 years                 | 9                     | 3.36                  | -                                                  |
| 65-74 years                 | 7                     | 1.38                  | -                                                  |
| 75-84 years                 | 0                     | 0.19                  | -                                                  |
| Total                       | 17                    | 5.36                  | 3.1 (1.7-4.7)                                      |
| Females                     |                       |                       |                                                    |
| 45-54 years                 | 1                     | 0.07                  | -                                                  |
| 55-64 years                 | 3                     | 0.66                  | -                                                  |
| 65-74 years                 | 2                     | 0.18                  | -                                                  |
| 75-84 years                 | 0                     | 0.06                  | -                                                  |
| Total                       | 6                     | 0.97                  | 6.2 (1.2-11.1)                                     |
| Total males and females     | 23                    | 6.34                  | 3.6 (2.2-5.1)                                      |
| <b>3-year follow-up</b>     |                       |                       |                                                    |
| Males                       |                       |                       |                                                    |
| 45-54 years                 | 3                     | 0.69                  | -                                                  |
| 55-64 years                 | 14                    | 5.18                  | -                                                  |
| 65-74 years                 | 7                     | 2.04                  | -                                                  |
| 75-84 years                 | 0                     | 0.28                  | -                                                  |
| Total                       | 24                    | 8.18                  | 2.5 (1.3-3.6)                                      |
| Females                     |                       |                       |                                                    |
| 45-54 years                 | 1                     | 0.10                  | -                                                  |
| 55-64 years                 | 3                     | 0.99                  | -                                                  |
| 65-74 years                 | 4                     | 0.35                  | -                                                  |
| 75-84 years                 | 0                     | 0.09                  | -                                                  |
| Total                       | 8                     | 1.53                  | 5.2 (1.6-8.8)                                      |
| Total males and females     | 32                    | 9.72                  | 3.3 (2.2-4.4)                                      |

<sup>a</sup>Deaths calculated based on participants enrolled in 2013-2015 who died over varying follow-up periods.
